# Supplementary material for: Multimodal Abnormalities of Brain Structure and Function in Major Depressive Disorder: A Meta-Analysis of Neuroimaging Studies
Source: Atypon-hosted journal article supplement (doi:10.1176/appi.ajp.2019.19050560), 2020-02-26
Supplement: ajp_19050560_correction01.pdf [file ajp_19050560_correction01.pdf]

## **Correction to Gray et al.**

When the article “Multimodal Abnormalities of Brain Structure and Function in Major Depressive Disorder: A Meta-Analysis of Neuroimaging Studies,” by Jodie P. Gray et al. (doi: 10.1176/appi.ajp.2019.19050560) was published in the May 2020 issue, the lower three panels in Figure 3 were mislabeled. The labels were corrected and the article was reposted online on July 29, 2022.
