# Supplementary material for: Multimodal Abnormalities of Brain Structure and Function in Major Depressive Disorder: A Meta-Analysis of Neuroimaging Studies
Source: Atypon-hosted journal article supplement (doi:10.1176/appi.ajp.2019.19050560), 2020-02-26
Supplement: appi.ajp.2019.19050560.ds001.pdf [file appi.ajp.2019.19050560.ds001.pdf]

 


Psychiatry Online
